# Supplementary material for: The relationship between off-hours admissions for primary percutaneous coronary intervention, door-to-balloon time and mortality for patients with ST-elevation myocardial infarction in England: a registry-based prospective national cohort study
Source: PubMed Central journal article supplement (PMC7362773; doi:10.1136/bmjqs-2019-010067), 2019-12-12
Supplement: bmjqs-2019-010067supp001.pdf [file bmjqs-2019-010067supp001.pdf]

**The relationship between off-hours admissions for primary percutaneous coronary intervention, door-to-balloon time and mortality for patients with ST-elevation myocardial infarction in England: a registry-based prospective national cohort study**

**Supplementary material**

## Contents

|                                                                                                                                                                                                                                                                |    |
|----------------------------------------------------------------------------------------------------------------------------------------------------------------------------------------------------------------------------------------------------------------|----|
| <b>Appendix 1: The Myocardial Ischaemia National Audit Project (MINAP) registry – data collection and data quality</b> .....                                                                                                                                   | 1  |
| <b>Supplementary Table 1: Door-to-balloon times for excluded cases due to missing adjusted mini-GRACE (AMG) risk score variables</b> .....                                                                                                                     | 2  |
| <b>Supplementary Table 2: Mortality outcomes for excluded cases due to missing adjusted mini-GRACE (AMG) risk score variables</b> .....                                                                                                                        | 2  |
| <b>Supplementary Table 3: MINAP variable definitions</b> .....                                                                                                                                                                                                 | 3  |
| <b>Supplementary Table 4 – Hierarchical logistic regression model, 30-day mortality without adjustment for DTB times</b> .....                                                                                                                                 | 5  |
| <b>Supplementary Table 5 – Hierarchical logistic regression model, in-hospital mortality without adjustment for DTB times</b> .....                                                                                                                            | 7  |
| <b>Supplementary Figure 1: Distribution of door-to-balloon times for PPCI patients – 2007-2012</b> .....                                                                                                                                                       | 9  |
| <b>Supplementary Table 6 – Hierarchical logistic regression model, 30-day mortality with adjustment for DTB times</b> .....                                                                                                                                    | 10 |
| <b>Supplementary Table 7 – Hierarchical logistic regression model, in-hospital mortality with adjustment for DTB times</b> .....                                                                                                                               | 12 |
| <b>Supplementary Table 8 – Adjusted 30-day and in-hospital mortality by time of admission for PPCI (alternative definition of off-hours <sup>1</sup>)</b> .....                                                                                                | 14 |
| <b>Supplementary Table 9 - Adjusted 30-day and in-hospital mortality by time of admission <sup>1</sup> for PPCI (for analytical cohort including inter-hospital transfers, day-time only centres and PPCI cases with DTB times greater than 6 hours)</b> ..... | 15 |
| <b>Appendix 2: Door-to-balloon times and mortality</b> .....                                                                                                                                                                                                   | 16 |
| <b>References</b> .....                                                                                                                                                                                                                                        | 18 |

**Appendix 1: The Myocardial Ischaemia National Audit Project (MINAP) registry – data collection and data quality**

The Myocardial Ischaemia National Audit Project (MINAP) accrues data for episodes of care from patients with acute coronary syndromes (ACS) admitted to all acute National Health Service (NHS) hospitals in England and Wales. [1] Hospitals use MINAP software (secure web portal), locally developed software or commercial applications to enter data which are then uploaded to central servers managed by the National Institute for Cardiovascular Outcomes Research (NICOR). Data is captured via manual entry by clinical audit staff, nurses or doctors. [2] The costs of local data entry are borne by the participating hospitals but non-financial incentives operate at the hospital level. [1]

To ensure data quality, annual validation exercises are conducted, where every hospital is required to re-enter 20 key fields from the case notes of 20 randomly selected patients. Agreement between the original and re-entered data is assessed and sent to hospitals to help them identify areas of improvement. [2] The median level of agreement between MINAP data and re-audit data was 89.5% in 2008. [1]

**Supplementary Table 1: Door-to-balloon times for excluded cases due to missing adjusted mini-GRACE (AMG) risk score variables**

|                            | Regular hours(N=9,217) | Off-hours(N=11,017) |
|----------------------------|------------------------|---------------------|
| Door-to-balloon times(IQR) | 44(32-65)              | 54(37-79)           |

**Supplementary Table 2: Mortality outcomes for excluded cases due to missing adjusted mini-GRACE (AMG) risk score variables**

|                        | Regular hours(N=7,974) | Off-hours(N=9,761) |
|------------------------|------------------------|--------------------|
| 30-day mortality%      | 7.54%                  | 6.72%              |
| In-hospital mortality% | 6.36%                  | 5.50%              |

**Supplementary Table 3: MINAP variable definitions**

| <b>Variable</b>                                            | <b>Description</b>                                                                                                                                                                                                                                                                                                                                                                                                                                                                                                                                                                                                                                                                                                                                                     |
|------------------------------------------------------------|------------------------------------------------------------------------------------------------------------------------------------------------------------------------------------------------------------------------------------------------------------------------------------------------------------------------------------------------------------------------------------------------------------------------------------------------------------------------------------------------------------------------------------------------------------------------------------------------------------------------------------------------------------------------------------------------------------------------------------------------------------------------|
| Time of arrival at hospital                                | Time of arrival of the ambulance at the front door (time recorded by ambulance service).                                                                                                                                                                                                                                                                                                                                                                                                                                                                                                                                                                                                                                                                               |
| Time of reperfusion treatment                              | Time of onset of lytic treatment (infusion or injection). The time the first device is used in coronary artery (balloon, stent or extraction catheter). It is not the time the angioplasty guidewire is first introduced, even if this restores flow.                                                                                                                                                                                                                                                                                                                                                                                                                                                                                                                  |
| Initial reperfusion treatment: pPCI                        | Primary PCI for STEMI/LBBB                                                                                                                                                                                                                                                                                                                                                                                                                                                                                                                                                                                                                                                                                                                                             |
| Discharge diagnosis - Myocardial infarction (ST elevation) | There should be a history consistent with the diagnosis. The diagnosis requires the presence of (new) cardiographic changes of ST elevation consistent with infarction of $\geq 2$ mm in contiguous chest leads and/or ST elevation of $\geq 1$ mm ST elevation in 2 or more standard leads. (New LBBB is included; although new ST elevation may be apparent in the presence of LBBB). There must be troponin elevation above the local reference range This group includes all patients with STEMI regardless of whether typical changes were evident on the initial ECG or developed subsequently. If ST elevation is present on any ECG during the episode in association with elevated troponin, then the diagnosis must be Myocardial infarction (ST elevation). |
| Heart rate                                                 | The heart rate is recorded from the first ECG after admission to hospital, whilst in a stable cardiac rhythm i.e. sinus rhythm, or chronic AF. In complete heart block, ventricular rate recorded.                                                                                                                                                                                                                                                                                                                                                                                                                                                                                                                                                                     |
| Systolic BP                                                | The first systolic blood pressure recorded after index admission to Hospital.                                                                                                                                                                                                                                                                                                                                                                                                                                                                                                                                                                                                                                                                                          |
| Elevated cardiac markers                                   | Identifies if cardiac biomarkers are raised during the acute phase of admission.                                                                                                                                                                                                                                                                                                                                                                                                                                                                                                                                                                                                                                                                                       |
| Cardiac arrest                                             | Cardiac arrests for patients with infarction who arrest in hospital. Also includes patients with infarction who have an out of hospital cardiac arrest and who survive to be admitted to hospital.                                                                                                                                                                                                                                                                                                                                                                                                                                                                                                                                                                     |
| Creatinine                                                 | Recorded within 24 hours of index admission (micromol/L.) There is an in-built range check checking that the entered value is 30 – 1000 micromol/L.                                                                                                                                                                                                                                                                                                                                                                                                                                                                                                                                                                                                                    |
| Loop diuretic                                              | Given at admission and drug continued or introduced while in hospital.                                                                                                                                                                                                                                                                                                                                                                                                                                                                                                                                                                                                                                                                                                 |
| Previous AMI                                               | Any previously validated episode of acute myocardial infarction.                                                                                                                                                                                                                                                                                                                                                                                                                                                                                                                                                                                                                                                                                                       |
| Previous angina                                            | Symptoms due to cardiac ischaemia developing or already in existence at least 2 weeks prior to admission, and continuing up to admission.                                                                                                                                                                                                                                                                                                                                                                                                                                                                                                                                                                                                                              |
| History of hypertension                                    | A patient already receiving treatment (drug, dietary or lifestyle) for hypertension or with recorded BP $>140/90$ on at least 2 occasions before admission.                                                                                                                                                                                                                                                                                                                                                                                                                                                                                                                                                                                                            |
| History / present PVD                                      | Presence of peripheral vascular disease, either presently symptomatic or previously treated. Include renovascular disease and aortic aneurysm.                                                                                                                                                                                                                                                                                                                                                                                                                                                                                                                                                                                                                         |
| History of stroke / CVD                                    | A history of cerebrovascular ischaemia, including transient cerebral ischaemic episodes as well as events with deficit lasting $>24$ hours.                                                                                                                                                                                                                                                                                                                                                                                                                                                                                                                                                                                                                            |
| History of asthma or COPD                                  | Any form of obstructive airways disease.                                                                                                                                                                                                                                                                                                                                                                                                                                                                                                                                                                                                                                                                                                                               |
| History of chronic renal failure                           | Defined as creatinine consistently more than 200 micromol/L.                                                                                                                                                                                                                                                                                                                                                                                                                                                                                                                                                                                                                                                                                                           |
| History / present hypercholesterolemia                     | A value recorded during the first 24 hours after index admission. There is an in-built range check checking that the entered value is 2.5 – 25 mmol/L.                                                                                                                                                                                                                                                                                                                                                                                                                                                                                                                                                                                                                 |
| Previous PCI                                               | A percutaneous coronary intervention at any time prior to this admission.                                                                                                                                                                                                                                                                                                                                                                                                                                                                                                                                                                                                                                                                                              |
| Previous CABG                                              | Coronary artery bypass grafting at any time prior to this admission.                                                                                                                                                                                                                                                                                                                                                                                                                                                                                                                                                                                                                                                                                                   |

|                                 |                                                                                                                |
|---------------------------------|----------------------------------------------------------------------------------------------------------------|
| Family history of premature CHD | Identifies a family history of premature CHD by diagnosis in males before 55 years or females before 65 years. |
|---------------------------------|----------------------------------------------------------------------------------------------------------------|

Source: NICOR: Data collection for the Myocardial Ischaemia National Audit Project – Application Notes

**Supplementary Table 4 – Hierarchical logistic regression model, 30-day mortality without adjustment for DTB times**

| Variable (reference)                 | 30-day mortality Odds-ratio | 95% confidence interval | Wald p-value |
|--------------------------------------|-----------------------------|-------------------------|--------------|
| -Intercept-                          | -                           | -                       | <0.001       |
| Off-hours*                           | 1.13                        | (1.01, 1.25)            | 0.02         |
| AMG score                            | 1.04                        | (1.04, 1.05)            | <0.001       |
| Female patient                       | 0.91                        | (0.81, 1.02)            | 0.12         |
| Deprivation (most deprived)          | 1.00                        | -                       |              |
| 2                                    | 0.82                        | (0.65, 1.03)            | 0.09         |
| 3                                    | 0.89                        | (0.71, 1.11)            | 0.32         |
| 4                                    | 0.88                        | (0.70, 1.11)            | 0.30         |
| 5                                    | 0.80                        | (0.64, 1.01)            | 0.07         |
| 6                                    | 0.90                        | (0.72, 1.13)            | 0.40         |
| 7                                    | 0.75                        | (0.59, 0.95)            | 0.01         |
| 8                                    | 0.73                        | (0.58, 0.93)            | 0.01         |
| 9                                    | 0.66                        | (0.52, 0.84)            | <0.01        |
| 10                                   | 0.65                        | (0.50, 0.84)            | <0.01        |
| Previous AMI                         | 0.96                        | (0.80, 1.15)            | 0.67         |
| Previous angina                      | 0.97                        | (0.82, 1.15)            | 0.77         |
| History of hypertension              | 0.87                        | (0.77, 0.97)            | 0.02         |
| History/present PVD                  | 1.11                        | (0.84, 1.46)            | 0.45         |
| History of stroke/CVD                | 1.19                        | (0.97, 1.45)            | 0.07         |
| History of asthma/COPD               | 1.04                        | (0.88, 1.22)            | 0.62         |
| History of CRF                       | 1.36                        | (1.04, 1.78)            | 0.02         |
| History/present hypercholesterolemia | 0.79                        | (0.69, 0.90)            | <0.01        |
| Previous PCI                         | 0.90                        | (0.71, 1.14)            | 0.41         |
| Previous CABG                        | 0.75                        | (0.52, 1.10)            | 0.14         |
| Family history of premature CHD      | 0.77                        | (0.67, 0.88)            | <0.001       |
| Current smoker                       | 0.98                        | (0.86, 1.13)            | 0.88         |
| Diabetes                             | 1.71                        | (1.46, 1.97)            | <0.001       |
| Month (January)                      | 1.00                        | -                       |              |
| February                             | 1.01                        | (0.77, 1.33)            | 0.90         |
| March                                | 1.16                        | (0.89, 1.52)            | 0.24         |
| April                                | 1.20                        | (0.93, 1.56)            | 0.15         |
| May                                  | 0.94                        | (0.72, 1.23)            | 0.68         |
| June                                 | 1.07                        | (0.82, 1.40)            | 0.59         |
| July                                 | 0.94                        | (0.72, 1.23)            | 0.69         |
| August                               | 1.03                        | (0.76, 1.35)            | 0.77         |
| September                            | 0.94                        | (0.72, 1.23)            | 0.67         |
| October                              | 1.02                        | (0.78, 1.32)            | 0.86         |

|                                                  |                 |              |        |
|--------------------------------------------------|-----------------|--------------|--------|
| November                                         | 1.07            | (0.82, 1.38) | 0.59   |
| December                                         | 1.05            | (0.81, 1.36) | 0.68   |
| Year (2007)                                      | 1.00            | -            |        |
| 2008                                             | 0.92            | (0.66, 1.27) | 0.62   |
| 2009                                             | 1.09            | (0.80, 1.48) | 0.57   |
| 2010                                             | 1.09            | (0.80, 1.49) | 0.55   |
| 2011                                             | 0.95            | (0.70, 1.30) | 0.79   |
| 2012                                             | 1.04            | (0.77, 1.42) | 0.75   |
| Annual hospital PPCI volume                      | 0.99            | (0.99, 0.99) | <0.001 |
| Annual hospital PPCI volume squared              | 1.00            | (1.00, 1.00) | <0.001 |
| <b>Random-effect standard deviation estimate</b> | Hospital = 0.24 |              |        |

\* Average marginal effects  $dy/dx$  is 0.122



**Supplementary Table 5 – Hierarchical logistic regression model, in-hospital mortality without adjustment for DTB times**

| Variable (reference)                 | In-hospital mortality Odds-ratio | 95% confidence interval | Wald p-value |
|--------------------------------------|----------------------------------|-------------------------|--------------|
| -Intercept-                          | -                                | -                       | <0.001       |
| Off-hours*                           | 1.16                             | (1.02, 1.32)            | 0.02         |
| AMG score                            | 1.05                             | (1.05, 1.06)            | <0.001       |
| Female patient                       | 0.94                             | (0.82, 1.07)            | 0.38         |
| Deprivation (most deprived)          | 1.00                             | -                       |              |
| 2                                    | 0.79                             | (0.60, 1.04)            | 0.09         |
| 3                                    | 0.74                             | (0.56, 0.98)            | 0.04         |
| 4                                    | 0.89                             | (0.68, 1.18)            | 0.45         |
| 5                                    | 0.78                             | (0.59, 1.03)            | 0.08         |
| 6                                    | 0.85                             | (0.65, 1.12)            | 0.26         |
| 7                                    | 0.64                             | (0.48, 0.86)            | <0.01        |
| 8                                    | 0.68                             | (0.50, 0.90)            | <0.01        |
| 9                                    | 0.72                             | (0.54, 0.96)            | 0.02         |
| 10                                   | 0.62                             | (0.45, 0.85)            | <0.01        |
| Previous AMI                         | 0.94                             | (0.76, 1.16)            | 0.58         |
| Previous angina                      | 1.00                             | (0.83, 1.21)            | 0.96         |
| History of hypertension              | 0.85                             | (0.74, 0.97)            | 0.02         |
| History/present PVD                  | 1.22                             | (0.89, 1.67)            | 0.21         |
| History of stroke/CVD                | 1.09                             | (0.86, 1.37)            | 0.46         |
| History of asthma/COPD               | 1.02                             | (0.85, 1.24)            | 0.77         |
| History of CRF                       | 1.26                             | (0.92, 1.72)            | 0.14         |
| History/present hypercholesterolemia | 0.77                             | (0.66, 0.90)            | <0.001       |
| Previous PCI                         | 0.97                             | (0.74, 1.28)            | 0.87         |
| Previous CABG                        | 0.80                             | (0.52, 1.24)            | 0.33         |
| Family history of premature CHD      | 0.73                             | (0.61, 0.86)            | <0.001       |
| Current smoker                       | 1.15                             | (0.98, 1.35)            | 0.08         |
| Diabetes                             | 1.67                             | (1.42, 1.97)            | <0.001       |
| Month (January)                      | 1.00                             | -                       |              |
| February                             | 0.91                             | (0.65, 1.27)            | 0.58         |
| March                                | 1.18                             | (0.86, 1.61)            | 0.29         |
| April                                | 1.16                             | (0.85, 1.58)            | 0.34         |
| May                                  | 0.92                             | (0.67, 1.27)            | 0.63         |
| June                                 | 1.04                             | (0.75, 1.42)            | 0.80         |
| July                                 | 0.86                             | (0.62, 1.19)            | 0.37         |
| August                               | 1.10                             | (0.80, 1.51)            | 0.53         |
| September                            | 0.96                             | (0.70, 1.32)            | 0.82         |
| October                              | 0.95                             | (0.70, 1.30)            | 0.76         |

|                                                  |                 |              |        |
|--------------------------------------------------|-----------------|--------------|--------|
| November                                         | 0.97            | (0.71, 1.33) | 0.89   |
| December                                         | 0.99            | (0.73, 1.34) | 0.96   |
| Year (2007)                                      | 1.00            | -            |        |
| 2008                                             | 0.86            | (0.59, 1.25) | 0.44   |
| 2009                                             | 0.92            | (0.64, 1.33) | 0.68   |
| 2010                                             | 0.99            | (0.68, 1.45) | 0.99   |
| 2011                                             | 0.78            | (0.53, 1.14) | 0.20   |
| 2012                                             | 1.00            | (0.68, 1.46) | 0.97   |
| Annual hospital PPCI volume                      | 0.99            | (0.99, 0.99) | <0.001 |
| Annual hospital PPCI volume squared              | 1.00            | (1.00, 1.00) | <0.01  |
| <b>Random-effect standard deviation estimate</b> | Hospital = 0.44 |              |        |

\* Average marginal effects  $dy/dx$  is 0.154

**Supplementary Figure 1: Distribution of door-to-balloon times for PPCI patients – 2007-2012**

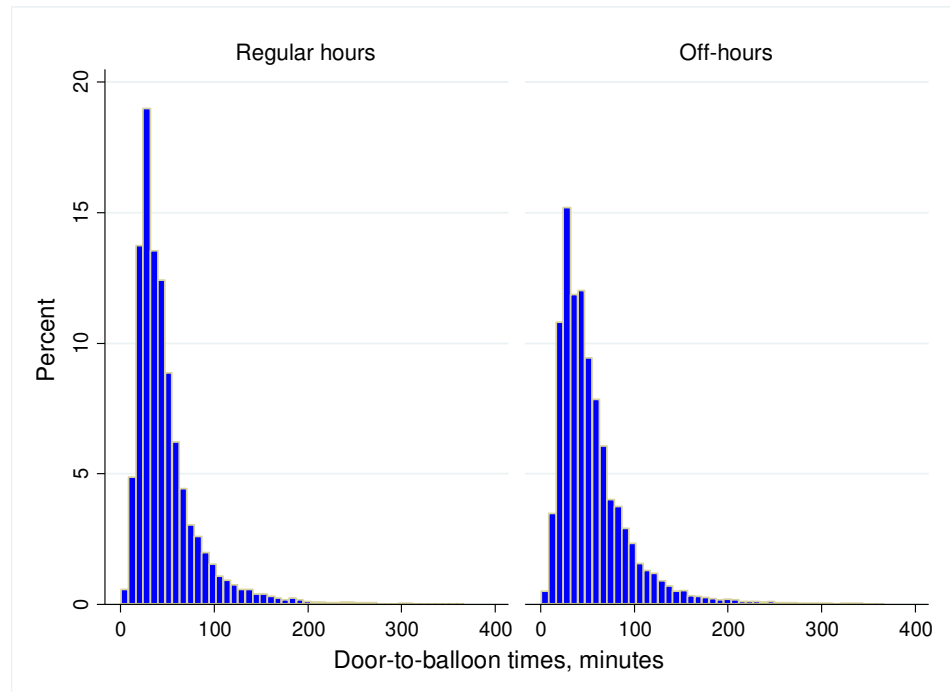

| Percentiles – DTB times<br>(minutes) |                  |               |
|--------------------------------------|------------------|---------------|
|                                      | Regular<br>hours | Off-<br>hours |
| 1%                                   | 10               | 11            |
| 5%                                   | 16               | 18            |
| 10%                                  | 20               | 22            |
| 25%                                  | 27               | 30            |
| 50%                                  | 38               | 45            |
| 75%                                  | 58               | 68            |
| 90%                                  | 89               | 101           |
| 95%                                  | 118              | 131           |
| 99%                                  | 209              | 227           |

**Supplementary Table 6 – Hierarchical logistic regression model, 30-day mortality with adjustment for DTB times**

| Variable (reference)                 | 30-day mortality Odds-ratio | 95% confidence interval | Wald p-value |
|--------------------------------------|-----------------------------|-------------------------|--------------|
| -Intercept-                          | -                           | -                       | <0.001       |
| Off-hours                            | 1.08                        | (0.97, 1.20)            | 0.15         |
| AMG score                            | 1.04                        | (1.04, 1.05)            | <0.001       |
| DTB time (per 10 min increase)       | 1.04                        | (1.03, 1.05)            | <0.001       |
| Female patient                       | 0.90                        | (0.81, 1.02)            | 0.10         |
| Deprivation (most deprived)          | 1.00                        | -                       |              |
| 2                                    | 0.81                        | (0.65, 1.02)            | 0.08         |
| 3                                    | 0.90                        | (0.72, 1.13)            | 0.38         |
| 4                                    | 0.89                        | (0.71, 1.13)            | 0.36         |
| 5                                    | 0.81                        | (0.65, 1.03)            | 0.09         |
| 6                                    | 0.92                        | (0.73, 1.16)            | 0.50         |
| 7                                    | 0.76                        | (0.60, 0.97)            | 0.03         |
| 8                                    | 0.76                        | (0.60, 0.96)            | 0.02         |
| 9                                    | 0.68                        | (0.53, 0.86)            | <0.01        |
| 10                                   | 0.66                        | (0.51, 0.86)            | <0.01        |
| Previous AMI                         | 0.94                        | (0.79, 1.14)            | 0.58         |
| Previous angina                      | 0.96                        | (0.81, 1.13)            | 0.63         |
| History of hypertension              | 0.86                        | (0.77, 0.97)            | 0.01         |
| History/present PVD                  | 1.09                        | (0.82, 1.44)            | 0.54         |
| History of stroke/CVD                | 1.18                        | (0.96, 1.44)            | 0.09         |
| History of asthma/COPD               | 1.02                        | (0.86, 1.20)            | 0.79         |
| History of CRF                       | 1.34                        | (1.02, 1.75)            | 0.03         |
| History/present hypercholesterolemia | 0.79                        | (0.69, 0.90)            | <0.001       |
| Previous PCI                         | 0.91                        | (0.72, 1.15)            | 0.44         |
| Previous CABG                        | 0.70                        | (0.48, 1.03)            | 0.07         |
| Family history of premature CHD      | 0.77                        | (0.67, 0.88)            | <0.001       |
| Current smoker                       | 0.99                        | (0.86, 1.13)            | 0.91         |
| Diabetes                             | 1.69                        | (1.47, 1.94)            | <0.001       |
| Month (January)                      | 1.00                        | -                       |              |
| February                             | 1.02                        | (0.77, 1.34)            | 0.88         |
| March                                | 1.15                        | (0.88, 1.50)            | 0.28         |
| April                                | 1.20                        | (0.93, 1.57)            | 0.15         |
| May                                  | 0.94                        | (0.72, 1.23)            | 0.67         |
| June                                 | 1.07                        | (0.82, 1.40)            | 0.58         |
| July                                 | 0.95                        | (0.72, 1.24)            | 0.72         |
| August                               | 1.04                        | (0.80, 1.37)            | 0.73         |
| September                            | 0.94                        | (0.72, 1.23)            | 0.68         |
| October                              | 1.03                        | (0.80, 1.34)            | 0.76         |

|                                                  |                 |              |       |
|--------------------------------------------------|-----------------|--------------|-------|
| November                                         | 1.08            | (0.84, 1.40) | 0.51  |
| December                                         | 1.06            | (0.82, 1.37) | 0.62  |
| Year (2007)                                      | 1.00            | -            |       |
| 2008                                             | 0.91            | (0.66, 1.26) | 0.58  |
| 2009                                             | 1.10            | (0.81, 1.50) | 0.51  |
| 2010                                             | 1.10            | (0.81, 1.51) | 0.51  |
| 2011                                             | 0.93            | (0.72, 1.34) | 0.94  |
| 2012                                             | 1.07            | (0.79, 1.46) | 0.63  |
| Annual hospital PPCI volume                      | 0.99            | (0.99, 0.99) | <0.01 |
| Annual hospital PPCI volume squared              | 1.00            | (1.00, 1.00) | <0.01 |
| <b>Random-effect standard deviation estimate</b> | Hospital = 0.24 |              |       |

**Supplementary Table 7 – Hierarchical logistic regression model, in-hospital mortality with adjustment for DTB times**

| Variable (reference)                 | In-hospital mortality Odds-ratio | 95% confidence interval | Wald p-value |
|--------------------------------------|----------------------------------|-------------------------|--------------|
| -Intercept-                          | -                                | -                       | <0.001       |
| Off-hours                            | 1.09                             | (0.95, 1.24)            | 0.18         |
| AMG score                            | 1.05                             | (1.05, 1.06)            | <0.001       |
| DTB time (per 10 min increase)       | 1.06                             | (1.04, 1.07)            | <0.001       |
| Female patient                       | 0.93                             | (0.81, 1.06)            | 0.31         |
| Deprivation (most deprived)          | 1.00                             | -                       |              |
| 2                                    | 0.78                             | (0.59, 1.03)            | 0.08         |
| 3                                    | 0.76                             | (0.57, 1.00)            | 0.06         |
| 4                                    | 0.90                             | (0.68, 1.19)            | 0.49         |
| 5                                    | 0.79                             | (0.60, 1.04)            | 0.10         |
| 6                                    | 0.86                             | (0.65, 1.14)            | 0.31         |
| 7                                    | 0.66                             | (0.49, 0.89)            | <0.01        |
| 8                                    | 0.70                             | (0.52, 0.94)            | 0.02         |
| 9                                    | 0.74                             | (0.56, 0.99)            | 0.04         |
| 10                                   | 0.63                             | (0.46, 0.87)            | <0.01        |
| Previous AMI                         | 0.92                             | (0.74, 1.14)            | 0.45         |
| Previous angina                      | 0.98                             | (0.80, 1.18)            | 0.83         |
| History of hypertension              | 0.84                             | (0.73, 0.97)            | 0.02         |
| History/present PVD                  | 1.18                             | (0.86, 1.63)            | 0.29         |
| History of stroke/CVD                | 1.07                             | (0.85, 1.36)            | 0.52         |
| History of asthma/COPD               | 0.99                             | (0.82, 1.20)            | 0.95         |
| History of CRF                       | 1.23                             | (0.90, 1.68)            | 0.18         |
| History/present hypercholesterolemia | 0.76                             | (0.65, 0.89)            | <0.001       |
| Previous PCI                         | 0.99                             | (0.75, 1.30)            | 0.95         |
| Previous CABG                        | 0.73                             | (0.47, 1.13)            | 0.16         |
| Family history of premature CHD      | 0.74                             | (0.62, 0.87)            | <0.01        |
| Current smoker                       | 1.16                             | (0.98, 1.36)            | 0.07         |
| Diabetes                             | 1.64                             | (1.39, 1.93)            | <0.001       |
| Month (January)                      | 1.00                             | -                       |              |
| February                             | 0.91                             | (0.65, 1.27)            | 0.60         |
| March                                | 1.15                             | (0.84, 1.57)            | 0.36         |
| April                                | 1.16                             | (0.85, 1.59)            | 0.33         |
| May                                  | 0.92                             | (0.67, 1.26)            | 0.61         |
| June                                 | 1.04                             | (0.75, 1.43)            | 0.79         |
| July                                 | 0.87                             | (0.63, 1.20)            | 0.40         |
| August                               | 1.11                             | (0.81, 1.53)            | 0.48         |

|                                                  |                 |              |       |
|--------------------------------------------------|-----------------|--------------|-------|
| September                                        | 0.95            | (0.69, 1.32) | 0.80  |
| October                                          | 0.97            | (0.71, 1.33) | 0.89  |
| November                                         | 1.00            | (0.73, 1.36) | 0.99  |
| December                                         | 1.00            | (0.74, 1.36) | 0.97  |
| Year (2007)                                      | 1.00            | -            |       |
| 2008                                             | 0.86            | (0.59, 1.25) | 0.44  |
| 2009                                             | 0.96            | (0.66, 1.39) | 0.84  |
| 2010                                             | 1.03            | (0.70, 1.51) | 0.85  |
| 2011                                             | 0.83            | (0.57, 1.23) | 0.37  |
| 2012                                             | 1.07            | (0.73, 1.57) | 0.70  |
| Annual hospital PPCI volume                      | 0.99            | (0.99, 0.99) | <0.01 |
| Annual hospital PPCI volume squared              | 1.00            | (1.00, 1.00) | <0.01 |
| <b>Random-effect standard deviation estimate</b> | Hospital = 0.46 |              |       |

**Supplementary Table 8 – Adjusted 30-day and in-hospital mortality by time of admission for PPCI (alternative definition of off-hours <sup>1</sup>)**

|                       | Adjusted OR <sup>a</sup> for off-hours (95% CI) <sup>2</sup> | Adjusted OR <sup>b</sup> for off-hours (95% CI) <sup>3</sup> |
|-----------------------|--------------------------------------------------------------|--------------------------------------------------------------|
| 30-day mortality      | 1.12 (1.01 - 1.25; p=0.03)                                   | 1.08 (0.96 - 1.20; p=0.16)                                   |
| In-hospital mortality | 1.13(1.00 – 1.29; p=0.04)                                    | 1.07(0.94 – 1.22; p=0.29)                                    |

p, p-value; OR, odds ratio

<sup>1</sup> Off-hours defined as admissions during weekends and between 7:00 pm – 6:59 am on weekdays.

<sup>2</sup> Adjusted OR<sup>a</sup> – obtained using a hierarchical logistic regression model that adjusted for AMG risk score, sex, Index of Multiple Deprivation score, previous acute myocardial infarction, angina, peripheral vascular disease, cerebrovascular disease(stroke), percutaneous coronary intervention, coronary artery bypass grafting, chronic renal failure, diabetes, smoking status, hypercholesterolemia, hypertension, asthma/chronic obstructive pulmonary disease (COPD), family history of coronary heart disease, annual hospital PPCI volume and month and year of admission. Hospitals included as random intercepts.

<sup>3</sup> Adjusted OR<sup>b</sup> – all variables from OR<sup>a</sup> plus DTB time



**Supplementary Table 9 - Adjusted 30-day and in-hospital mortality by time of admission<sup>1</sup> for PPCI (for analytical cohort including inter-hospital transfers, day-time only centres and PCI cases with DTB times greater than 6 hours)**

| n=49,604              | Adjusted OR <sup>a</sup> for off- | Adjusted OR <sup>b</sup> for off-hours |
|-----------------------|-----------------------------------|----------------------------------------|
|                       | hours (95% CI) <sup>2</sup>       | (95% CI) <sup>3</sup>                  |
| 30-day mortality      | 1.12 (1.01 - 1.24; p=0.02)        | 1.08 (0.97 - 1.20; p=0.15)             |
| In-hospital mortality | 1.16(1.03 – 1.31; p=0.01)         | 1.10(0.98 – 1.25; p=0.09)              |

p, p-value; OR, odds ratio

<sup>1</sup> Off-hours defined as admissions during weekends and between 6:30 pm – 7:59 am on weekdays.

<sup>2</sup> Adjusted OR<sup>a</sup> – obtained using a hierarchical logistic regression model that adjusted for AMG risk score, sex, Index of Multiple Deprivation score, previous acute myocardial infarction, angina, peripheral vascular disease, cerebrovascular disease(stroke), percutaneous coronary intervention, coronary artery bypass grafting, chronic renal failure, diabetes, smoking status, hypercholesterolemia, hypertension, asthma/chronic obstructive pulmonary disease (COPD), family history of coronary heart disease, annual hospital PPCI volume and month and year of admission. Hospitals included as random intercepts.

<sup>3</sup> Adjusted OR<sup>b</sup> – all variables from OR<sup>a</sup> plus DTB time

## Appendix 2: Door-to-balloon times and mortality

Patients in longer DTB time categories had higher unadjusted 30-day and in-hospital mortality, ranging from 2.77% 30-day mortality for PPCIs with DTB times within 30 minutes to 7.04% for patients with DTB times between 121-150 minutes (Supplementary Figure 2).

After adjustment for patient risk factors, seasonality and time trend, as well as annual hospital PPCI volume, longer DTB time continued to be associated with a higher likelihood of mortality (Supplementary Figure 3). Estimates from the hierarchical logistic regression model indicated that a 10 minute increment in DTB time increased the odds of 30-day mortality by 4.2% ( $p < .001$ ). DTB time was also associated with higher in-hospital mortality, where a 10 minutes increase in DTB time increased the odds of in-hospital mortality by 6.2% ( $p < .001$ ).

Supplementary Figure 2: Unadjusted 30-day and in-hospital mortality rates by DTB time category

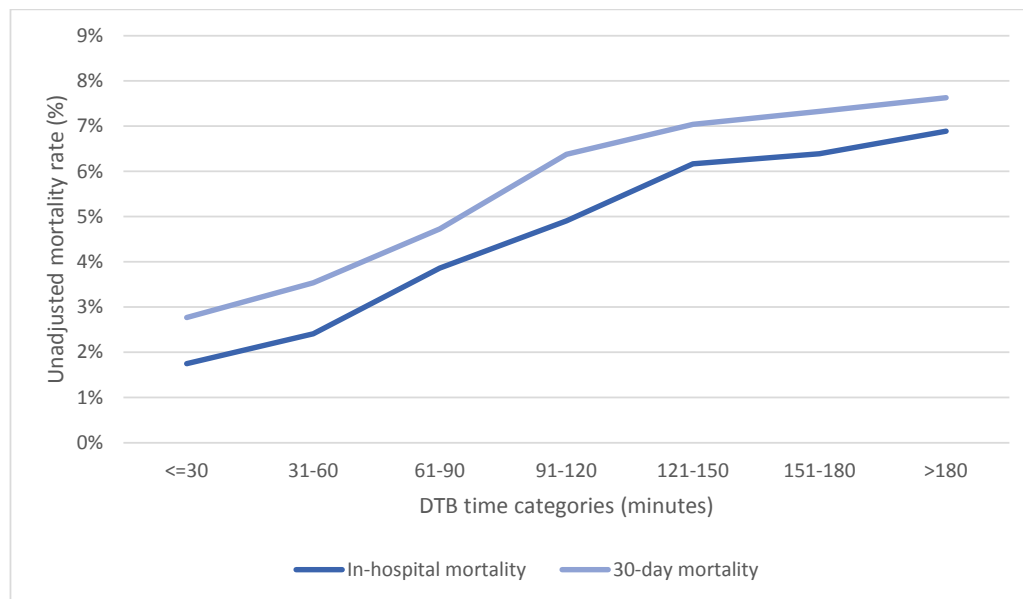

Supplementary Figure 3: Predicted 30-day and in-hospital mortality from the hierarchical logistic regression model over a range of door-to-balloon times

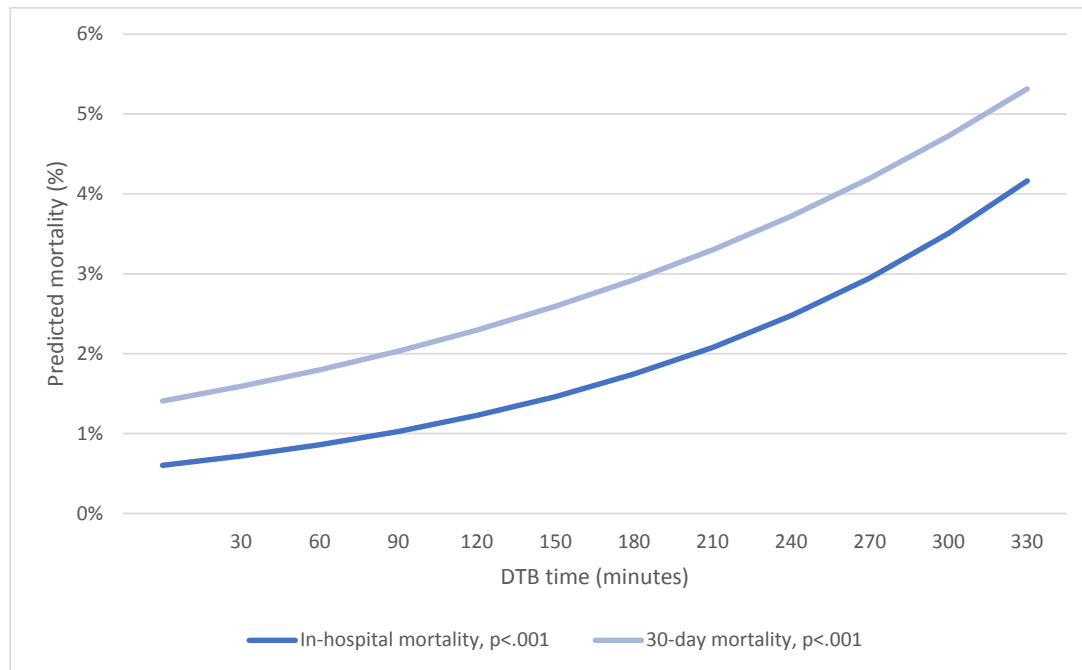

All other covariates held constant.

## References

- 1 Herrett E, Smeeth L, Walker L, *et al*. The Myocardial Ischaemia National Audit Project (MINAP). *Heart* 2010;**96**:1264–7. doi:10.1136/hrt.2009.192328
- 2 NICOR. Myocardial Ischaemia National Audit Project (MINAP) Annual Public Report (2012/13). National Institute for Cardiovascular Outcomes Research 2013. <https://www.nicor.org.uk/category/minap/> (accessed 15 Dec 2018).
